# Supplementary material for: Architecture of a nascent viral fusion pore
Source: PubMed Central journal article supplement — EMBO J. 2010 Feb 18;29(7):1299–311. doi: 10.1038/emboj.2010.13 (PMC2857459; doi:10.1038/emboj.2010.13), 2010-02-18
Supplement: emboj201013s1.pdf [file emboj201013s1.pdf]

## SUPPLEMENTARY MATERIAL

accompanying “Architecture of a Nascent Viral Fusion Pore” by K. K. Lee

### SUPPLEMENTARY FIGURES

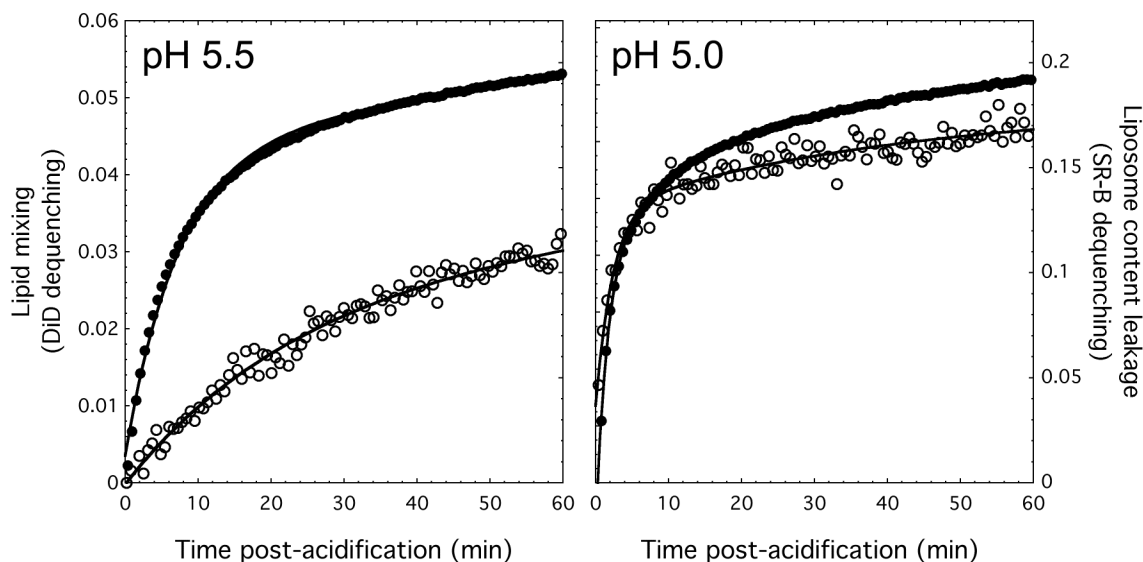

**Supplementary Figure S1. Fluorescence spectroscopy of DiD-labeled virions mixed with sulforhodamine-B containing DOPC liposomes at pH 5.5 and 5.0.** Fluorescence dequenching of the water-soluble (SRB, solid circles) and lipophilic (DiD, open circles) dyes was monitored as a function of time. As in the case sulforhodamine-B/DiD doubly labeled DOPC liposomes fusing with unlabeled virions (Figure 2), leakage of liposomal contents appear to take place more rapidly than lipid mixing. Extent of dequenching was calculated as  $[F(t)-F(0)]/[F_{TX-100}-F(0)]$ , where  $F_{TX-100}$  was the fluorescence measured in the presence of 0.1% w/v TritonX-100 detergent. Fitted curves are only meant to guide the eye and do not reflect a particular kinetic model.

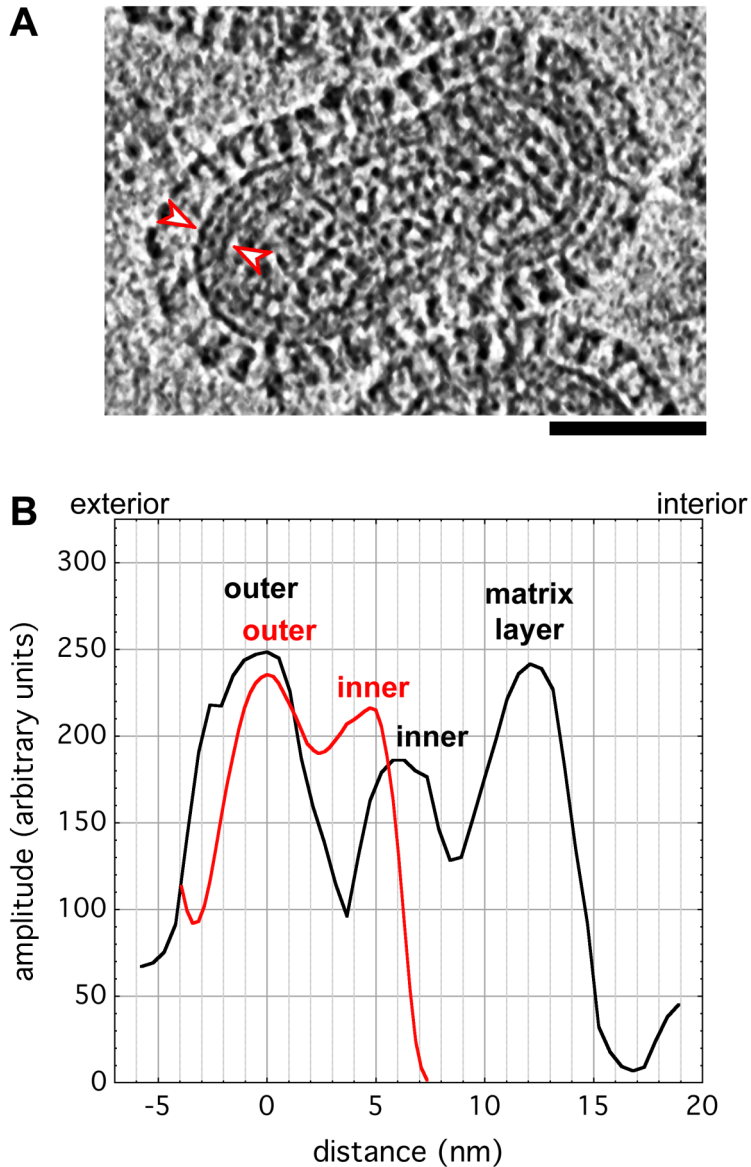

**Supplementary Figure S2. Electron density plot through a typical virion envelope and through a DOPC liposome bilayer. (A)** Most influenza virions exhibit a 3-layered envelope. Microscope defocus 3  $\mu\text{m}$ . 50 nm scalebar. **(B)** A typical density distribution plot taken orthogonally through the virus envelope (position in panel A indicated by arrowheads) is shown below. 3 distinct peaks are seen with  $\sim 6$  nm relative separations. The intermediate layer is generally observed to have the weakest density. A density plot for DOPC liposome bilayer (red curve),  $\sim 4$  nm leaflet spacing, is shown for comparison.

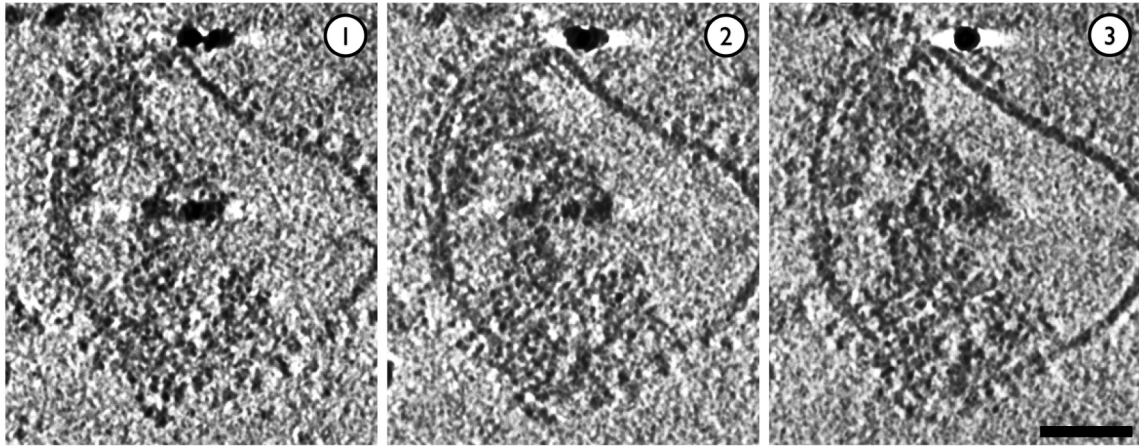

**Supplementary Figure S3. Representative post-fusion particle.** Due to the clumped interior density, it is not clear whether these entities resulted from the fusion of one of the dominant matrix-bearing virus particles with a liposome or one of the matrixless particles. At least a portion of the membrane on the lefthand side of the fused entity appears to be a standard bilayer, seen in slice 2 for example. Sample acidified for 5 min at pH 5.5. 5.3 nm virtual serial sections shown. Microscope defocus 3  $\mu\text{m}$ . Scalebar 50 nm.

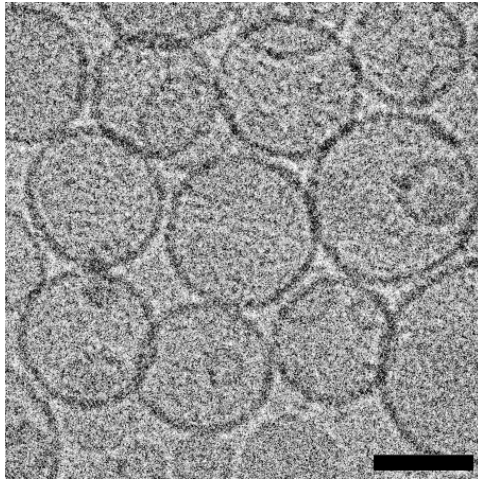

**Supplementary Figure S4. Low-dose cryo-EM image of DOPC liposome substrate.**

Scalebar 100 nm. Microscope defocus 4  $\mu\text{m}$ . The liposomes, produced by 5 rounds of freeze-thawing and 21 extrusions through a polycarbonate membrane with 100 nm pores, are predominantly unilamellar. Relatively few small vesicles are found inside the liposomes (~15%), a number of the small vesicles are located outside of the liposomes and may have been generated by interaction of the phospholipid with the plasma-cleaned carbon-coated grids. By contrast, nearly every liposome in contact with a virus particle exhibits one or more ~20 nm internal vesicles (see main text). Scalebar 50 nm.

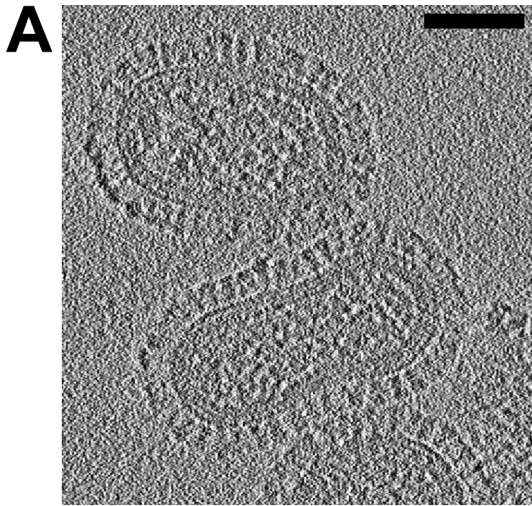

**Supplementary Figure S5. Tomogram filtering.** Comparison of unfiltered tomogram of 2 viruses (**A**) with 3-D median filtering (**B**), and median plus gaussian (width  $1.5\sigma$ ) filtering (**C**). A 5.3 nm z-slice through the tomographically reconstructed density is shown. Microscope defocus 3  $\mu\text{m}$ . 50 nm scalebar. Filtering or denoising brings out features such as the three membrane strata and individual glycoprotein spikes.

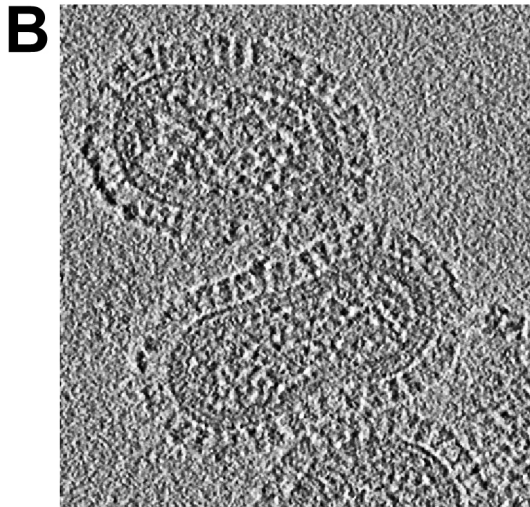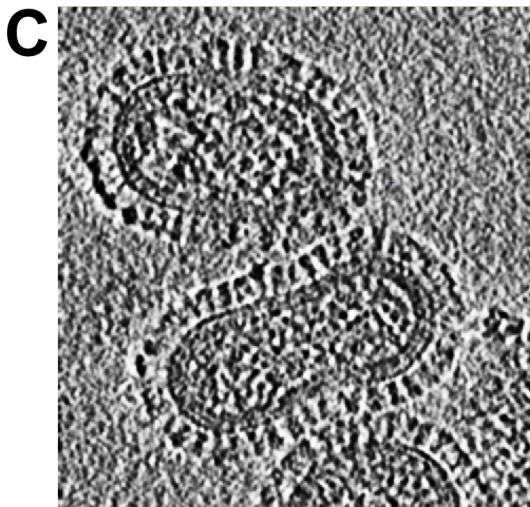

## **SUPPLEMENTARY MOVIES**

**Supplementary Movie 1.** Reconstructed tomogram showing a DOPC liposome being pinched by an influenza virion <Lee\_SupplementaryMovie1.mov>

**Supplementary Movie 2.** Tomogram showing a complex of DOPC liposome and virus that exhibits a prefusion funnel-shaped feature < Lee\_SupplementaryMovie2.mov >

**Supplementary Movie 3.** Tomogram showing a complex of DOPC liposome and virus that exhibits the prefusion funnel-shaped feature < Lee\_SupplementaryMovie3.mov >
